# Supplementary material for: Examining the link between chromosomal instability and aneuploidy in human cells
Source: PubMed Central journal article supplement — J Cell Biol. 2008 Feb 25;180(4):665–72. doi: 10.1083/jcb.200712029 (PMC2265570; doi:10.1083/jcb.200712029), 2008-02-25
Supplement: supp_jcb.200712029_7.pdf [file supp_jcb.200712029_7.pdf]

Table S1. **Cell karyotypes and modal chromosome numbers**

| Cell line | Reported karyotype <sup>a</sup> | Measured karyotype <sup>b</sup> | Modal chromosome number <sup>c</sup> |   |   |    |
|-----------|---------------------------------|---------------------------------|--------------------------------------|---|---|----|
|           |                                 |                                 | 2                                    | 7 | 8 | 15 |
| Diploid   |                                 |                                 |                                      |   |   |    |
| RPE1      | 46                              | 46                              | 2                                    | 2 | 2 | 2  |
| HCT116    | 45                              | 45                              | 2                                    | 2 | 2 | 2  |
| Aneuploid |                                 |                                 |                                      |   |   |    |
| HT29      | 71                              | 66                              | 3                                    | 3 | 1 | 3  |
| Caco2     | 96                              | 78                              | 5                                    | 4 | 4 | 4  |
| MCF-7     | 82                              | 75                              | 4                                    | 4 | 3 | 4  |

<sup>a</sup><http://www.atcc.org>.

<sup>b</sup>Determined by counting at least 50 chromosome spreads per cell line.

<sup>c</sup>From at least 800 nuclei for each cell line using centromere-specific FISH.

Table S2. **Modal chromosome numbers in HCT116 cell clones (percentage of cells that deviate from mode)**

| Cell line                                 | Mode (% deviation)    |                       |                       |                         |
|-------------------------------------------|-----------------------|-----------------------|-----------------------|-------------------------|
|                                           | Chromosome            |                       |                       |                         |
|                                           | 2                     | 7                     | 8                     | 15                      |
| Control (clone 1)                         | 2 (2.3)               | 2 (4.5)               | 2 (4.8)               | 2 (6.2)                 |
| Control (clone 2)                         | 2 (5.0) <sup>a</sup>  | 2 (5.6) <sup>a</sup>  | 2 (6.2) <sup>a</sup>  | 2 (5.9)                 |
| Control (clone 3)                         | 2 (3.3)               | 2 (1.3)               | 2 (4.6)               | 2 (6.5) <sup>a</sup>    |
| Monastrol 1 d (clone 4)                   | 2 (3.6)               | 2 (4.0)               | 2 (3.0)               | 2 (6.0)                 |
| Monastrol 1 d (clone 5)                   | 2 (2.6)               | 2 (4.2)               | 2 (5.8)               | 2 (4.0)                 |
| Monastrol 1 d (clone 6)                   | 2 (5.3)               | 2 (3.3)               | 2 (8.2)               | 2 (5.9)                 |
| Monastrol 3 d (clone 7)                   | 2 (7.6)               | 2 (4.4)               | 2 (5.1)               | 2 (16.6) <sup>c</sup>   |
| Monastrol 3 d (clone 8)                   | 2 (4.3)               | 2 (3.3)               | 2 (6.6)               | 2 (10.2)                |
| Monastrol 3 d (clone 9)                   | 2 (2.3)               | 2 (3.6)               | 2 (5.3)               | 2 (5.6)                 |
| Monastrol 5 d (clone 10)                  | 2 (21.9) <sup>c</sup> | 2 (5.6)               | 2 (28.2) <sup>c</sup> | 2 (23.3) <sup>c</sup>   |
| Monastrol 5 d (clone 11)                  | 2 (16.5) <sup>c</sup> | 2 (4.6)               | 2 (11.5) <sup>c</sup> | 2 (17.2) <sup>c</sup>   |
| Monastrol 5 d (clone 12)                  | 2 (18.7) <sup>c</sup> | 2 (3.6)               | 2 (25.2) <sup>c</sup> | 2 (19.7) <sup>c</sup>   |
| Monastrol 5 d (clone 13)                  | 2 (14.4) <sup>c</sup> | 2 (4.3)               | 2 (10.5)              | 2 (20.0) <sup>c</sup>   |
| Monastrol 5 d (clone 14)                  | 2 (6.0)               | 2 (7.3)               | 2 (5.3)               | 2 (5.6)                 |
| Monastrol 5 d (clone 15)                  | 2 (10.9) <sup>c</sup> | 2 (2.3)               | 2 (6.9)               | 2 (12.5) <sup>c</sup>   |
| Monastrol 5 d (clone 16)                  | 2 (6.1)               | 2 (2.5)               | 2 (4.4)               | 2 (12.3) <sup>c</sup>   |
| Monastrol 7 d (clone 17)                  | 2 (14.3) <sup>c</sup> | 2 (5.2)               | 2 (7.2)               | 2 (19.5) <sup>c</sup>   |
| Monastrol 7 d (clone 18)                  | 2 (15.7) <sup>c</sup> | 2 (2.3)               | 2 (5.0)               | 2 (17.0) <sup>c</sup>   |
| Monastrol 7 d (clone 19)                  | 2 (12.1) <sup>c</sup> | 2 (5.9)               | 2 (10.9) <sup>c</sup> | 2 (12.7) <sup>c</sup>   |
| Monastrol 7 d (clone 20)                  | 2 (10.9) <sup>c</sup> | 2 (8.9)               | 2 (17.5) <sup>c</sup> | 2 (16.2) <sup>c</sup>   |
| Monastrol 7 d (clone 21)                  | 2 (26.6) <sup>c</sup> | 2 (18.8) <sup>c</sup> | 2 (18.5) <sup>c</sup> | 2 (15.3) <sup>b,c</sup> |
| Monastrol 7 d (clone 22)                  | 4 (29.7) <sup>c</sup> | 4 (26.2) <sup>c</sup> | 4 (28.2) <sup>c</sup> | 4 (32.3) <sup>b,c</sup> |
| Monastrol 7 d (clone 23)                  | 2 (5.0)               | 2 (11.0) <sup>c</sup> | 2 (10.4)              | 2 (8.9)                 |
| Monastrol 9 d (clone 24)                  | 2 (5.9)               | 2 (9.5)               | 2 (12.5) <sup>c</sup> | 2 (7.9)                 |
| Monastrol 9 d (clone 25)                  | 2 (3.9)               | 2 (2.6)               | 2 (3.6)               | 2 (8.2)                 |
| Monastrol 9 d (clone 26)                  | 2 (2.3)               | 2 (2.3)               | 2 (2.6)               | 2 (7.8)                 |
| Monastrol every third division (clone 27) | 2 (11.8) <sup>c</sup> | 2 (6.0)               | 2 (10.3)              | 2 (16.7) <sup>c</sup>   |
| Monastrol every third division (clone 28) | 2 (6.3)               | 2 (4.6)               | 2 (10.2)              | 2 (12.7) <sup>c</sup>   |
| Monastrol every third division (clone 29) | 2 (4.6)               | 2 (7.9)               | 2 (10.9) <sup>c</sup> | 2 (13.5) <sup>c</sup>   |
| Monastrol every third division (clone 30) | 2 (5.3)               | 2 (6.5)               | 2 (9.7)               | 2 (12.3) <sup>c</sup>   |
| Monastrol every third division (clone 31) | 2 (6.6)               | 2 (11.6) <sup>c</sup> | 2 (8.9)               | 2 (20.7) <sup>c</sup>   |
| Nocodazole 1 d (clone 32)                 | 2 (2.0)               | 2 (2.0)               | 2 (4.6)               | 2 (6.9)                 |
| Nocodazole 1 d (clone 33)                 | 2 (6.5)               | 2 (4.7)               | 2 (4.7)               | 2 (7.8)                 |
| Nocodazole 1 d (clone 34)                 | 2 (5.6)               | 2 (6.3)               | 2 (8.2)               | 2 (11.0)                |
| Nocodazole 3 d (clone 35)                 | 2 (2.9)               | 2 (2.3)               | 2 (9.9)               | 2 (7.5)                 |
| Nocodazole 3 d (clone 36)                 | 2 (5.3)               | 2 (1.3)               | 3 (6.3)               | 2 (9.2)                 |
| Nocodazole 3 d (clone 37)                 | 2 (14.7) <sup>c</sup> | 2 (4.7)               | 2 (7.7)               | 2 (6.7)                 |
| Nocodazole 5 d (clone 38)                 | 4 (7.3)               | 4 (7.9)               | 4 (9.6)               | 4 (9.4) <sup>b</sup>    |
| Nocodazole 5 d (clone 39)                 | 2 (7.0)               | 2 (2.6)               | 2 (4.0)               | 2 (4.5)                 |
| Nocodazole 5 d (clone 40)                 | 2 (6.3)               | 2 (1.3)               | 2 (3.0)               | 2 (9.9)                 |
| Nocodazole 7 d (clone 41)                 | 2 (5.4)               | 2 (4.3)               | 2 (6.2)               | 2 (11.5) <sup>c</sup>   |
| Nocodazole 7 d (clone 42)                 | 2 (6.6)               | 2 (6.6)               | 2 (9.3)               | 2 (6.3)                 |
| Nocodazole 7 d (clone 43)                 | 2 (5.6)               | 2 (3.9)               | 2 (4.9)               | 2 (6.6)                 |
| Nocodazole 9 d (clone 44)                 | 2 (4.6)               | 2 (3.6)               | 2 (3.9)               | 2 (5.6)                 |
| Nocodazole 9 d (clone 45)                 | 2 (5.3)               | 2 (2.6)               | 2 (4.3)               | 2 (4.6)                 |
| Nocodazole 9 d (clone 46)                 | 2 (4.3)               | 2 (2.7)               | 2 (3.3)               | 2 (7.2)                 |
| Nocodazole 15 d (clone 47)                | 2 (5.9)               | 2 (4.2)               | 2 (5.2)               | 2 (5.9)                 |
| Nocodazole 15 d (clone 48)                | 2 (15.0) <sup>c</sup> | 2 (11.6) <sup>c</sup> | 2 (11.6) <sup>c</sup> | 2 (17.8) <sup>c</sup>   |
| Nocodazole 15 d (clone 49)                | 2 (10.3) <sup>c</sup> | 2 (6.8)               | 2 (7.1)               | 2 (17.0) <sup>c</sup>   |
| Nocodazole 20 d (clone 50)                | 2 (4.9)               | 2 (5.5)               | 2 (4.5)               | 2 (9.2)                 |
| Nocodazole 20 d (clone 51)                | 2 (3.6)               | 2 (3.9)               | 2 (7.5)               | 2 (4.2)                 |
| Nocodazole 20 d (clone 52)                | 2 (4.2)               | 2 (2.0)               | 2 (3.9)               | 2 (5.5)                 |

<sup>a</sup>Control cell clone used for statistical comparison for each chromosome.<sup>b</sup>Clones contained significant fractions of tetraploid cells.<sup>c</sup>P < 0.05,  $\chi^2$  test.

Table S3. **Modal chromosome numbers in RPE-1 cell clones (percentage of cells that deviate from mode)**

| Cell line                  | Mode (% deviation)   |                      |                       |                       |
|----------------------------|----------------------|----------------------|-----------------------|-----------------------|
|                            | Chromosome           |                      |                       |                       |
|                            | 2                    | 7                    | 8                     | 15                    |
| Control (clone 1)          | 2 (2.9) <sup>a</sup> | 2 (2.3)              | 2 (3.5)               | 2 (3.5) <sup>a</sup>  |
| Control (clone 2)          | 2 (2.3)              | 2 (3.9) <sup>a</sup> | 2 (3.9) <sup>a</sup>  | 2 (2.0)               |
| Control (clone 3)          | 2 (1.3)              | 2 (1.6)              | 2 (3.9)               | 2 (3.3)               |
| Monastrol 5 d (clone 4)    | 2 (3.0)              | 2 (2.0)              | 2 (5.6)               | 2 (4.3)               |
| Monastrol 5 d (clone 5)    | 2 (6.0)              | 2 (2.6)              | 2 (5.6)               | 2 (5.0)               |
| Monastrol 5 d (clone 6)    | 2 (3.3)              | 2 (3.9)              | 2 (4.5)               | 2 (6.9)               |
| Monastrol 15 d (clone 7)   | 2 (4.0)              | 2 (2.6)              | 2 (2.6)               | 2 (3.7)               |
| Monastrol 15 d (clone 8)   | 2 (4.9)              | 2 (2.9)              | 2 (9.1) <sup>b</sup>  | 2 (7.2) <sup>b</sup>  |
| Monastrol 15 d (clone 9)   | 2 (4.3)              | 2 (2.3)              | 2 (4.3)               | 2 (2.0)               |
| Monastrol 25 d (clone 10)  | 2 (3.0)              | 2 (4.3)              | 2 (11.3) <sup>b</sup> | 2 (4.6)               |
| Monastrol 25 d (clone 11)  | 2 (5.2)              | 2 (4.9)              | 2 (8.9) <sup>b</sup>  | 2 (5.8)               |
| Monastrol 25 d (clone 12)  | 2 (5.0)              | 2 (6.0)              | 2 (7.4)               | 2 (5.0)               |
| Nocodazole 5 d (clone 13)  | 2 (2.6)              | 2 (1.6)              | 2 (5.9)               | 2 (3.3)               |
| Nocodazole 5 d (clone 14)  | 2 (3.3)              | 2 (3.0)              | 2 (5.2)               | 2 (6.0)               |
| Nocodazole 5 d (clone 15)  | 2 (4.8)              | 2 (2.3)              | 2 (5.2)               | 2 (6.9)               |
| Nocodazole 15 d (clone 16) | 2 (6.6)              | 2 (3.9)              | 2 (6.9)               | 2 (10.2) <sup>b</sup> |
| Nocodazole 15 d (clone 17) | 2 (2.0)              | 2 (3.0)              | 3 (5.0)               | 2 (7.6) <sup>b</sup>  |
| Nocodazole 15 d (clone 18) | 2 (2.6)              | 2 (2.7)              | 2 (4.3)               | 2 (3.9)               |
| Nocodazole 25 d (clone 19) | 2 (2.6)              | 2 (3.2)              | 2 (7.8) <sup>b</sup>  | 2 (6.9)               |
| Nocodazole 25 d (clone 20) | 2 (2.3)              | 2 (2.3)              | 2 (6.3)               | 2 (4.0)               |
| Nocodazole 25 d (clone 21) | 2 (2.0)              | 2 (3.9)              | 2 (5.5)               | 2 (4.2)               |

<sup>a</sup>Control cell used for statistical comparison for each chromosome.

<sup>b</sup>P < 0.05,  $\chi^2$  test.

Table S4. **Modal chromosome numbers in aneuploid cell clones (percentage of cells that deviate from mode)**

| Cell line       | Mode (% deviation) |          |          |          |
|-----------------|--------------------|----------|----------|----------|
|                 | Chromosome         |          |          |          |
|                 | 2                  | 7        | 8        | 15       |
| HT29 (clone 1)  | 3 (6.1)            | 3 (20.1) | 1 (2.6)  | 3 (36.2) |
| HT29 (clone 2)  | 3 (11.8)           | 3 (9.8)  | 1 (3.3)  | 3 (39.7) |
| Caco2 (clone 1) | 5 (25.2)           | 4 (26.7) | 4 (21.6) | 4 (27.5) |
| Caco2 (clone 2) | 5 (18.0)           | 4 (14.8) | 4 (18.0) | 4 (32.7) |
| MCF-7 (clone 1) | 4 (20.4)           | 4 (15.7) | 3 (13.8) | 4 (32.4) |
| MCF-7 (clone 2) | 4 (13.5)           | 4 (16.9) | 3 (10.7) | 4 (41.8) |
